# Supplementary material
Source: Springer Nature journal article supplement (https://www.springermedizin.de/resource/supplementary/12950_2010_194_MOESM4_ESM.pdf/9558172)

**A**

|                       |   |   |      |    |    |     |
|-----------------------|---|---|------|----|----|-----|
| LPS (100 ng/ml)       | - | + | +    | +  | +  | +   |
| Arctiin ( $\mu$ g/ml) | - | - | 12.5 | 25 | 50 | 100 |

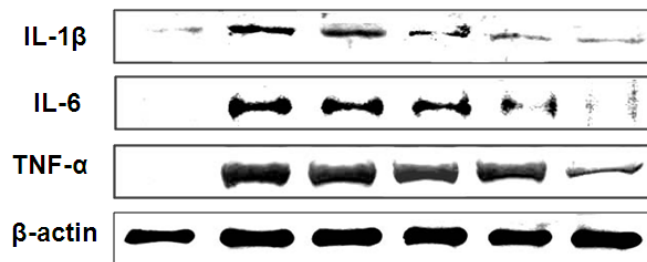**B**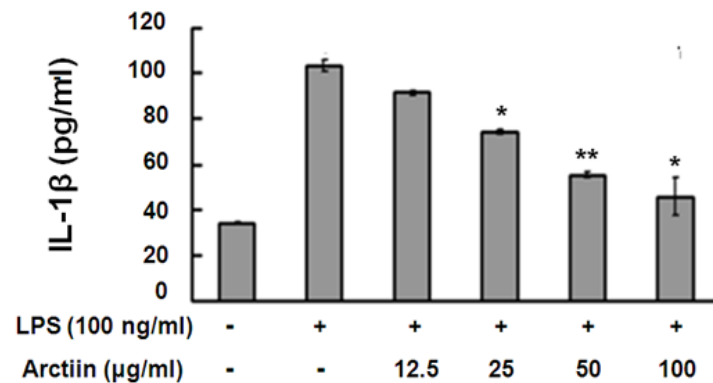**C**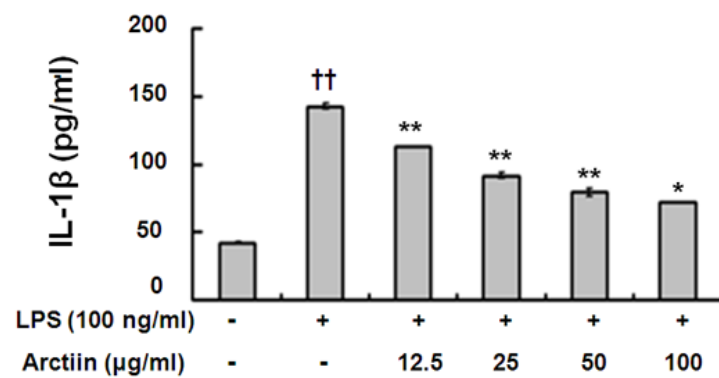

**D**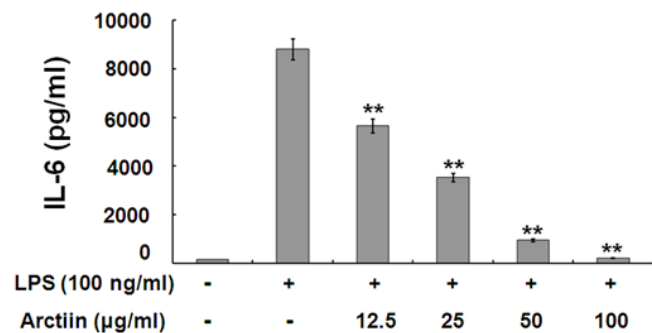**E**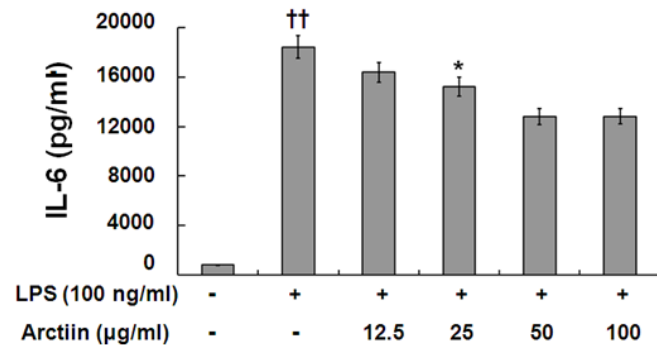**F**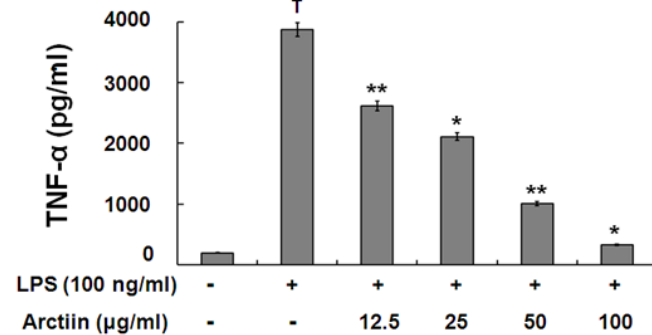**G**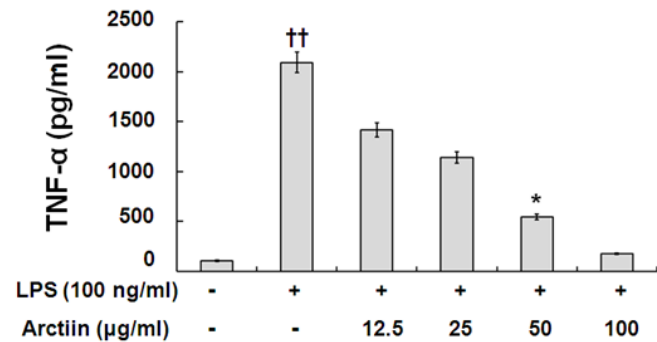

Supplement: MOESM4 [file 9558172]
